# Supplementary material for: Peroxisome Proliferator-Activated Receptor-α (PPARα) Expression in a Clinical Population of Pakistani Patients with Type 2 Diabetes and Dyslipidemia
Source: MDPI journal article supplement (doi:10.3390/ijms231810847), 2022-09-16
Supplement: s1 [file s1]

Supplemented data:

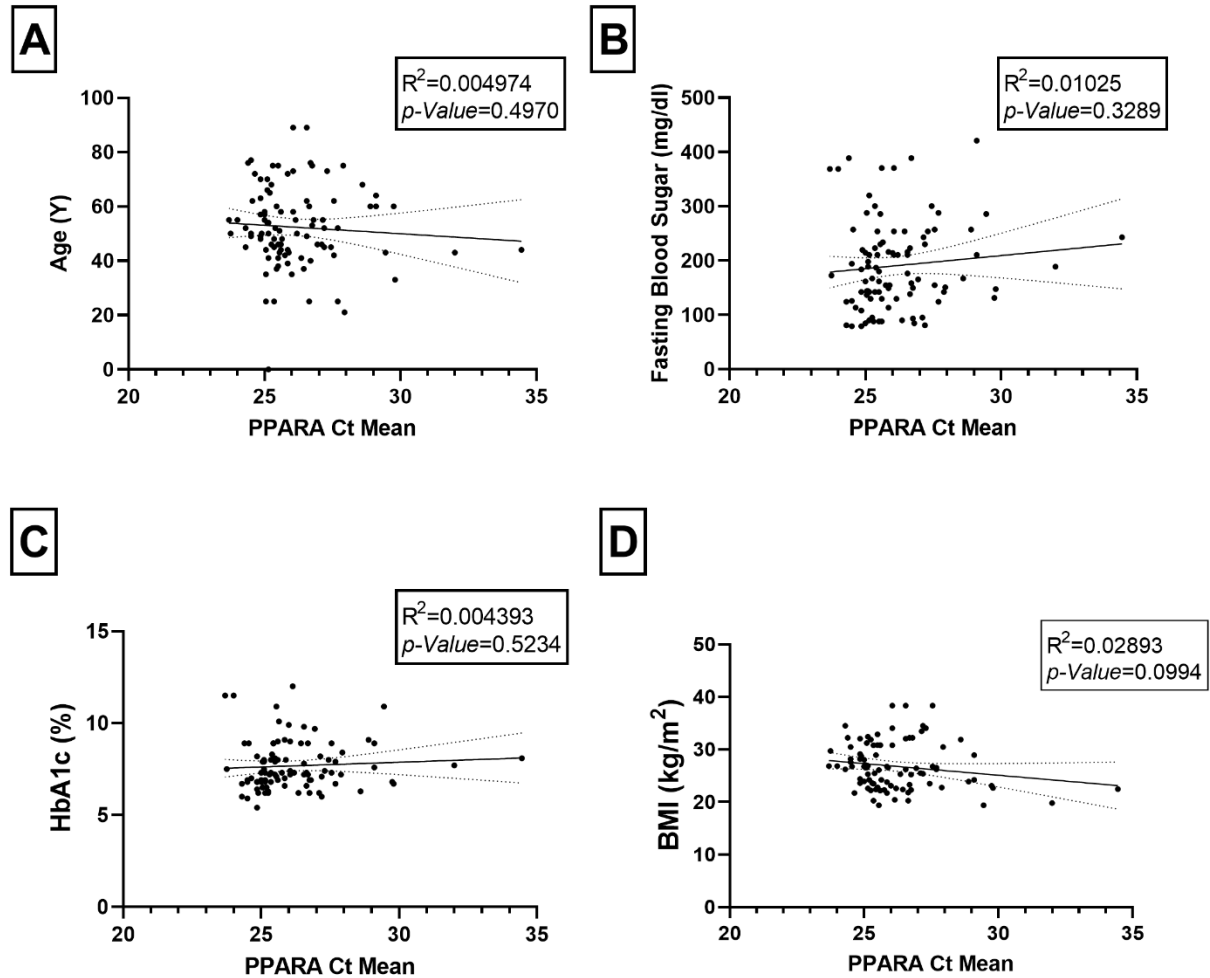

**Figure S1:** Correlation analysis between PPAR $\alpha$  gene expression and different T2DM Parameters.

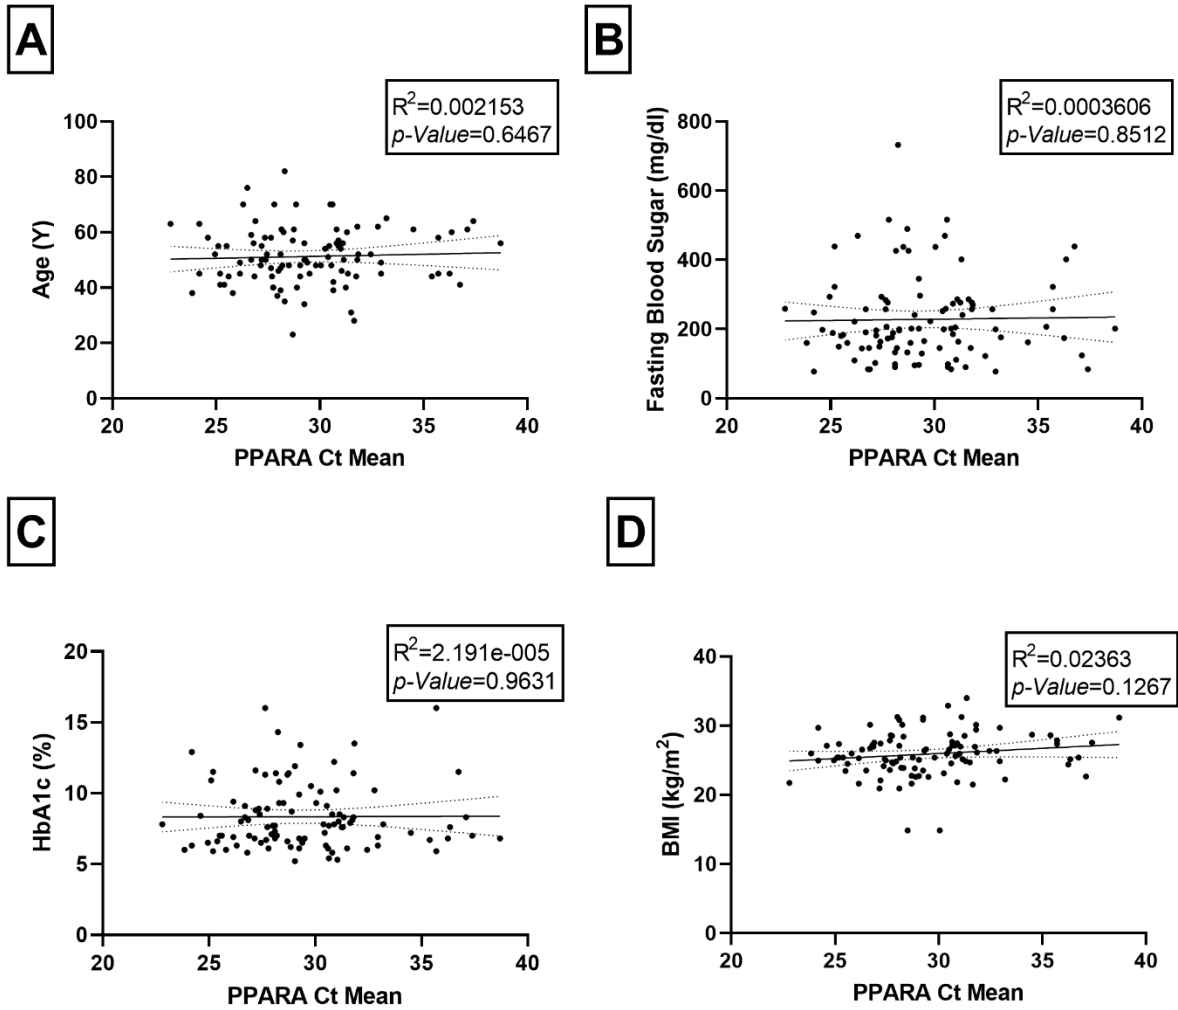

**Figure S2:** Correlation analysis between *PPARA* gene expression and different DD Parameters.

**Supplementary Table S1:** Diagnostic criteria for normal levels of lipid profile.

| Sr No. | Parameters                           | Normal Ranges                     |                                   |
|--------|--------------------------------------|-----------------------------------|-----------------------------------|
|        |                                      | Male                              | Female                            |
| 1      | Total cholesterol                    | 125-200 mg/dl<br>3.23- 5.17mmol/L | 125-200 mg/dl<br>3.23- 5.17mmol/L |
| 2      | Triglycerides                        | 130 mg/dl<br>1.47 mmol/L          | 130 mg/dl<br>1.47 mmol/L          |
| 3      | Low-density lipoprotein-cholesterol  | <100 mg/dl<br><2.58 mmol/L        | <100 mg/dl<br><2.58 mmol/L        |
| 4      | High-density lipoprotein-cholesterol | >50 mg/dl<br>>1.0 mmol/L          | >40 mg/dl<br>>1.0 mmol/L          |

**Supplementary Table S2:** Diagnostic criteria for type 2 diabetes.

| Sr No. | Parameters                       | Normal Ranges            |                          |
|--------|----------------------------------|--------------------------|--------------------------|
|        |                                  | Male                     | Female                   |
| 1      | Fasting blood glucose            | >7.0 mmol/L<br>126mg/dl  | >7.0 mmol/L<br>126mg/dl  |
| 2      | 2 hours post-load plasma glucose | 11.1 mmol/L<br>200 mg/dl | 11.1 mmol/L<br>200 mg/dl |
| 3      | Random plasma glucose            | 11.1 mmol/L<br>200 mg/dl | 11.1 mmol/L<br>200 mg/dl |
| 4      | HbA1c                            | 6.5%                     | 6.5%                     |

**Supplementary Table S3:** Gender-adjusted regression analysis of PPAR $\alpha$  expression.

|                  | <i>p-values</i> of the control group (n=100) after regression analysis with PPAR $\alpha$ expression |        | <i>p-values</i> of T2DM group (n=100) after regression analysis with PPAR $\alpha$ expression. |        | <i>p-values</i> of DD group (n=100) after regression analysis with PPAR $\alpha$ expression. |        |
|------------------|------------------------------------------------------------------------------------------------------|--------|------------------------------------------------------------------------------------------------|--------|----------------------------------------------------------------------------------------------|--------|
|                  | Male                                                                                                 | Female | Male                                                                                           | Female | Male                                                                                         | Female |
| Age              | 0.666                                                                                                | 0.972  | 0.775                                                                                          | 0.306  | 0.256                                                                                        | 0.153  |
| HbA1c (mmol/mol) | 0.004                                                                                                | 0.445  | 0.125                                                                                          | 0.937  | 0.295                                                                                        | 0.474  |

|                                        |       |       |       |       |       |       |
|----------------------------------------|-------|-------|-------|-------|-------|-------|
| Fasting<br>blood<br>glucose<br>(mg/dl) | 0.035 | 0.780 | 0.016 | 0.841 | 0.766 | 0.861 |
| tchol<br>(mg/dl)                       | 0.472 | 0.461 | 0.28  | 0.96  | 0.593 | 0.875 |
| TAGS<br>(mg/dl)                        | 0.383 | 0.427 | 0.491 | 0.547 | 0.054 | 0.872 |
| LDL (mg/dl)                            | 0.396 | 0.225 | 0.586 | 0.592 | 0.724 | 0.323 |
| HDL<br>(mg/dl)                         | 0.108 | 0.822 | 0.953 | 0.289 | 0.756 | 0.718 |
